# Supplementary material for: Metabonomic Characteristics of Myocardial Diastolic Dysfunction in Type 2 Diabetic Cardiomyopathy Patients
Source: Front Physiol. 2022 May 9;13:863347. doi: 10.3389/fphys.2022.863347 (PMC9150260; doi:10.3389/fphys.2022.863347)
Supplement: Supplementary file 1 [file Table2.xlsx]

## Sheet: Sheet1
	Supplement Table-3 Differentially up- and down-regulated metabolites
Index	Compounds	Class	VIP	Log2FC	Type
(pos)
MW0152140	L-Asp(4-L-Arg)	-- --	1.74	1.25	up
MEDL02200	Pantothenate	Others Vitamin	2.19	2.05	up
MEDP0825	N-Cyclohexylformamide	Alcohol and amines Amines	1.31	2.75	up
MEDN1502	2-Phenylbutyric acid	Organic acid And Its derivatives Organicacid and Its derivatives	1.35	1.43	up
MW0154054	N-(2-Methylpropanyl)hydroxylamine;N-Hydroxy-2-methylpropanamine;Isobutylhydroxylamine	Organic nitrogen compounds Organonitrogen compounds	1.56	1.65	up
MW0113056	4-Hydroxy-1-(3-pyridinyl)-1-butanone	Organic oxygen compounds Organooxygen compounds	1.77	1.79	up
MW0159208	Val Tyr Arg Glu	-- --	1.49	1.14	up
MW0146708	Bialaphos;Bilanafos;2-Amino-4-(methylphosphino)butyrylalanylalanine;gamma-(Hydroxymethylphosphinyl)-L-alpha-aminobutyryl-L-alanyl-L-alanine;Phosphinothricin tripeptide	Organic acids and derivatives Carboxylic acids and derivatives	1.32	1.93	up
MW0126281	Purmorphamine	Organoheterocyclic compounds Oxazinanes	1.16	1.49	up
MEDN0232	L-Rhamnose	Carboxylic acids and derivatives Sugars	1.38	3.46	up
MEDN0056	N-Acetyl-L-Leucine	Amino acid and Its metabolomics Amino acid derivatives	1.43	2.66	up
MW0007249	Gliclazide	Benzenoids Benzene and substituted derivatives	1.56	1.94	up
MW0152991	Lys His Ile Leu Ala	-- --	1.56	1.51	up
MW0015214	7-Keto-8-aminopelargonic acid	-- --	2.48	2.5	up
MW0127058	δ-Undecalactone	Organoheterocyclic compounds Lactones	2.32	2.12	up
MW0133644	4-hydroxy-2H,8H-[1,3]dioxolo[4,5-h]chromen-8-one	Phenylpropanoids and polyketides Coumarins and derivatives	1.02	1.02	up
MW0116518	1-(Piperidin-2-yl)propan-1-one	Organoheterocyclic compounds Piperidines	2.35	1.74	up
MW0000325	Lycorine	Alkaloids and derivatives Amaryllidaceae alkaloids	2.01	2.13	up
MW0000928	[2-Hydroxy-1-(4-methoxyphenyl)propyl] 4-methoxybenzoate	Benzenoids Benzene and substituted derivatives	1.26	1.26	up
MW0125983	Omeprazole sulfone	Organoheterocyclic compounds Benzimidazoles	1.44	4.05	up
MW0108614	N-Acetyl-DL-leucine	Organic acids and derivatives Carboxylic acids and derivatives	1.63	2.29	up
MW0110965	Cyclohexyl isocyanide	Organic nitrogen compounds Organonitrogen compounds	1.51	2.84	up
MW0107036	Glu-Thr	Organic acids and derivatives Carboxylic acids and derivatives	1.31	1.06	up
MW0105632	Antanapeptin A	Organic acids and derivatives Peptidomimetics	1.71	1.48	up
MW0147428	Chlorophyllide;Chlorophyllide a	-- --	1.11	1.03	up
MW0145824	Asn Lys Asp	-- --	1.47	1.33	up
MW0123716	Dinaciclib	Organoheterocyclic compounds Pyrazolopyrimidines	1.89	1.1	up
MW0012861	1-Myristoyl-2-hydroxy-sn-glycero-3-phosphoethanolamine	Lipids and lipid-like molecules Glycerophospholipids	1.46	2.99	up
MW0150445	Gly Phe Asn Thr Phe	-- --	1.14	1.36	up
MEDL01894	Valproic acid	Organic acids Organic acids	2.26	1.53	up
MW0126484	Rucaparib	Organoheterocyclic compounds Indoles and derivatives	1.28	1.3	up
MW0150122	Glu Pro Gly Tyr Ser	-- --	2.31	2.77	up
MW0142981	3-Hydroxyethylchlorophyllide a;3-Devinyl-3-(1-hydroxyethyl)chlorophyllide a	Organoheterocyclic compounds Tetrapyrroles and derivatives	1.66	1.4	up
MW0001494	19-Hydroxyandrost-4-ene-3,17-dione	Lipids and lipid-like molecules Steroids and steroid derivatives	2.1	-1.21	down
MW0141449	15-Oxo-beta-bilirubin	Organoheterocyclic compounds Tetrapyrroles and derivatives	1.9	-1.04	down
MW0122784	alpha-[3-(Nitrosoamino)propyl]-3-pyridinemethanol	Organoheterocyclic compounds Pyridines and derivatives	2.06	-1.49	down
MW0152691	Limonene-1,2-diol;(1S,2S,4R)-Limonene-1,2-diol;(1S,2S,4R)-Menth-8-ene-1,2-diol	Lipids and lipid-like molecules Prenol lipids	2.11	-1.36	down
MW0142370	2-Hydroxy-3-carboxy-6-oxo-7-methylocta-2,4-dienoate	Organic acids and derivatives Keto acids and derivatives	2	-1.91	down
MEDL01885	5-Acetamidopentanoic Acid	Organic acids Organic acids	2.28	-1.93	down
MW0103913	(3S,5S)-3,5-Diaminohexanoic acid	Organic acids and derivatives Carboxylic acids and derivatives	1.83	-1.39	down
MEDP1493	N6-methyladenosine	Nucleotide And Its metabolomics Nucleotide and Its metabolomics	2.48	-1.45	down
MEDN0682	Octadecanamide	Alcohol and amines Amines	1.24	-2.39	down
MW0005047	4-hydroxy-3-(3-methylbut-2-en-1-yl)benzoic acid	Benzenoids Benzene and substituted derivatives	2.37	-1.92	down
MW0143690	5-Oxo-delta-bilirubin	Organoheterocyclic compounds Tetrapyrroles and derivatives	2.66	-1.81	down
MW0162264	[4,5,6-trihydroxy-2-(hydroxymethyl)oxan-3-yl] 2-(1H-indol-3-yl)acetate	-- --	1.75	-1.19	down
MW0138237	Geldanamycin	Phenylpropanoids and polyketides Macrolactams	2.17	-1.81	down
MW0060314	PE-NMe2(18:0/20:1(11Z))	Lipids and lipid-like molecules Glycerophospholipids	1.56	-2.17	down
MW0003087	2-hydroxy-2-[4-hydroxy-3-(3-methylbut-2-en-1-yl)phenyl]acetic acid	Benzenoids Phenols	1.88	-1.47	down
MW0007336	Hydramethylnon	Benzenoids Benzene and substituted derivatives	1.9	-1.18	down
MW0106393	D-Glutamine	-- --	2.29	-1.23	down
MW0053769	Goshonoside F2	Lipids and lipid-like molecules Prenol lipids	1.07	-1.94	down
MEDL00785	N-Glycyl-L-Leucine	Amino acids and derivatives Amino acids and derivatives	1.42	-1.23	down
MW0146182	Asp Lys Arg Glu Lys	-- --	2.63	-1.33	down
MW0142817	3beta-(1-Pyrrolidinyl)-5alpha-pregnane-11,20-dione	Lipids and lipid-like molecules Steroids and steroid derivatives	2.32	-1.07	down
MW0059836	PE-NMe(22:0/22:2(13Z,16Z))	Lipids and lipid-like molecules Glycerophospholipids	1.56	-1.8	down
MW0138757	Leucoside	Phenylpropanoids and polyketides Flavonoids	2.3	-2.68	down
MW0114873	Metyrapone	Organic oxygen compounds Organooxygen compounds	3.45	-1.26	down
MW0059667	PE-NMe(20:2(11Z,14Z)/24:0)	Lipids and lipid-like molecules Glycerophospholipids	1.22	-1.33	down
MEDL01949	Gossypol	Terpenoids Sesquiterpenoids	2.6	-2.08	down
MW0126177	Piperonyl sulfoxide	Organoheterocyclic compounds Benzodioxoles	2.14	-1.24	down
MW0009245	O-Desmethylmycophenolic acid	Benzenoids Benzene and substituted derivatives	2.33	-2.16	down
MW0104790	2-Imino-1-imidazolidineacetic acid	Organic acids and derivatives Carboxylic acids and derivatives	3.51	-1.1	down
MW0123392	Clomipramine	Organoheterocyclic compounds Benzazepines	2.28	-1.3	down
MW0006549	Chlorothalonil	Benzenoids Benzene and substituted derivatives	2.92	-1.67	down
MW0126532	Sedanolide	Organoheterocyclic compounds Isobenzofurans	2.1	-1.37	down
MW0152732	L-N2-(2-Carboxyethyl)arginine;N2-(2-Carboxyethyl)-L-arginine	-- --	2.15	-1.06	down
MW0137747	Coumarin-suberoylanilide hydroxamic acid	Phenylpropanoids and polyketides Coumarins and derivatives	2.18	-1.4	down
MW0113120	4-Methylmethcathinone	Organic oxygen compounds Organooxygen compounds	2.01	-1.27	down
MW0138798	Linarin	Phenylpropanoids and polyketides Flavonoids	2.37	-2.76	down
MW0124192	Furmecyclox	Organoheterocyclic compounds Furans	2.1	-1.32	down
MW0055373	Norgestrel	Lipids and lipid-like molecules Steroids and steroid derivatives	1.05	-1.51	down
MW0115093	p-Coumaryl alcohol 4-O-glucoside	Organic oxygen compounds Organooxygen compounds	1.89	-1.05	down
MW0108562	N2-(1-Oxo-4-phenylbutyl)-L-glutamine	Organic acids and derivatives Carboxylic acids and derivatives	1.65	-1.65	down
MW0168307	Leu Asp Ser	Organic acids and derivatives Carboxylic acids and derivatives	1.84	-1.03	down
MW0155178	Phe Glu His Asp	-- --	2.52	-2.49	down
MW0108879	N-omega-Hydroxy-L-arginine	-- --	2.38	-1.87	down
MW0115063	Oleana-1,9(11)-dien-28-oic acid, 2-cyano-3,12-dioxo-, methyl ester	Organic oxygen compounds Organooxygen compounds	1.32	-1.16	down
MW0132617	3',4'-Methylenedioxyorobol	Phenylpropanoids and polyketides Isoflavonoids	2.44	-2.02	down
Index	Compounds	Class	VIP	Log2FC	Type
(neg)
MEDN0523	Indole-3-lactic acid	Heterocyclic compounds Indole and Its derivatives	3.12	1.66	up
MW0151553	Ile Phe Val Lys	-- --	1.73	1.26	up
MW0125002	Methohexital	Organoheterocyclic compounds Diazines	1.33	1.66	up
MW0142981	3-Hydroxyethylchlorophyllide a;3-Devinyl-3-(1-hydroxyethyl)chlorophyllide a	Organoheterocyclic compounds Tetrapyrroles and derivatives	1.5	1.47	up
MW0103994	(S) -2-Hydroxyglutaric acid	Organic acids and derivatives Hydroxy acids and derivatives	2.33	-1.54	down
MEDN1310	5-Hydroxymethyl-2-furancarboxylic acid	Organic acid And Its derivatives Organicacid and Its derivatives	1.48	-1.2	down
