# Supplementary material for: Metabonomic Characteristics of Myocardial Diastolic Dysfunction in Type 2 Diabetic Cardiomyopathy Patients
Source: Frontiers journal article supplement (doi:10.3389/fphys.2022.863347), 2022-05-09
Supplement: Table_1.pdf [file Table_1.pdf]

Supplement table-1.Chromatographic column  
mobile phase gradient condition T3

| <b>Time</b><br><b>(min)</b> | <b>Velocity</b><br><b>(mL/min)</b> | <b>A(%)</b> | <b>B(%)</b> |
|-----------------------------|------------------------------------|-------------|-------------|
| 0                           | 0.40                               | 95          | 5           |
| 11.0                        | 0.40                               | 10          | 90          |
| 12.0                        | 0.40                               | 10          | 90          |
| 12.1                        | 0.40                               | 95          | 5           |
| 14.0                        | 0.40                               | 95          | 5           |

Supplement table-2. Conditions of positive and negative ion mode mass spectrometry agilent.

| Parameter          | ESI <sup>+</sup> | ESI <sup>-</sup> |
|--------------------|------------------|------------------|
| Voltage            | 250              | 1500             |
| Gas Flow           | 8                | 8                |
| Fragmator          | 135              | 135              |
| Gas Temperature    | 325              | 325              |
| Sheath Temperature | 325              | 325              |
| Sheath Flow        | 11               | 11               |
| Nebulizer          | 40               | 40               |

Quality control samples (QC) were prepared by mixing sample extracts to analyze the repeatability of samples under the same processing method. In the process of instrumental analysis, a quality control sample was inserted into every 15 testing and analysis samples to monitor the repeatability of the analysis process.
